# Supplementary material for: MftG is crucial for ethanol metabolism of mycobacteria by linking mycofactocin oxidation to respiration
Source: eLife journal article supplement (doi:10.7554/elife.97559), 2024-06-14
Supplement: supp1 [file elife-97559-supp1-v1.pdf]

## Supplementary Text 1: Sequences of the plasmids generated in this study.

>pPG17

ATCGGTACCCGGTACTTGTACAGCTCGTCCATGCCGTACAGGAACAGGTGGTGGCGGCCCTCGGAGCGCTCGTACTGT  
TCCACGATGGTGTAGTCCTCGTTGTGGGAGGTGATGTCCAGCTTGGTGTCCACGTAGTAGTAGCCGGGCAGTTGCACGGG  
CTTCTTGGCCATGTAGATGGTCTTGAACCTCCACCAGGTAGTGGCCGCCGTCCTTCAGCTTCAGGGCCTGGTGGATCTCGC  
CCTTCAGCACGCCGTCGCGGGGTACAGGCGCTCGGTGGAGGCCCTCCAGCCCATGGTCTTCTTGTCAATTACGGGGCC  
GTCGGGGGGGAAGTTGGTGCCGCGCATTTACCTTGTAGATCAGCGTGCCGTCCTGCAGGGAGGAGTCTGGGTACG  
GTCACCAGACC GCCGTCCTCGAAGTTCATCACGCGCTCCCACTTGAAGCCCTCGGGGAAGGACAGCTTCTTGTAACTCGGG  
GATGTGCGCGGGGTGCTTACGTACGCCTTGGAGCCGTACATGAACTGGGGGGACAGGATGTCCAGGCGAAGGGCAGG  
GGGCCGCCCTTGGTACCTTCAGCTTGGCGGTCTGGGTGCCCTCGTAGGGGCGGCCCTCGCCCTCGCCCTCGATCTCGA  
ACTCGTGGCCGTTTCATGGAGCCCTCCATGCGCACCTTGAAGCGCATGAACTCTTGTGATGACCTCCTCGCCCTTGTCCACCA  
TTATATATTCCTCTTCTGGGATCCTCGGTGACGTGTGCGCGTAGCCGCTGCGCCAGAACACCCGCATCGCGGTGTCCA  
GTGCGACGTCCGGATCGAATCCTTGTGACGGGCCATGTGCCAATCTAGATCGTCGAGAAGGTGACGGCCAGTGGAGG  
ACGTACTGCTCCGAGACCTGCTACTGGACCAGCGCTCGCGTTCGGGGTGAGTACGAGGGCAGGGAAACCCCGAACA  
TGGGACGGCTCACCGGTTCCGAGAATGGGAGACCCTGCACCACGGCAATCCAATATTGATCCACTAGTCGGTGTCTGAT  
GTGCCGAGCGCGGCATCATCTGCAGGCGGTGCGCGCTCGTGGAAAGTGGCGGGTTCGACGAGACCATGCACTCGGGG  
GAGGATGTGACCTGTGCTGGCGCCTGGTTCGAGTTCGGGCGCGCCTGCGTTACGAACCGATCGCCCTGGTGGCGCACG  
ATCACCGCAACCTGCGAGCGTGGTTCACCCGCAAGGCATTCTATGGAACGTGGCCGCTCGCCGTGACGGTGGCCAT  
CCCAGGTAGCGAGTTCGCCGCTGGTGTACTCGGGGTGGACGCTGATGGTGTGGTGTGCTCGGGGTGGGCTCGTTCTTCG  
GCTACCTCGCCTCGCTCGCGGGCGCGGTGTTCCGCGGTACCCGCATCGCGCGGGCGCTCAGCGTGTGAGACCGAAC  
CCAAGGAGGTGCGGGTGGTGCAGCCACGGCCTGTGGTGTGCTCGCGGTTGAGTTGTGTTCCGCGATCTGTGCCACTA  
CTGGCCATCGGATGATCGCGCGGTGCTGTTCCGCCGGCGCGCACGCGGTGCTGGTGGCCGCGGTGGTGGACGG  
TGTGGTGCAGTGGGTGACGCGACGCGGCAACGCCGACGACACCAAACCGGTGCGACTGCTCACCCACATCGTGCTC  
AAGCGACTGGACGACATCGCCTACGGCACCGGTCTGTGGACCGCGGTGGTGCAGGCGGTACCTCGCGCGCTCAAGC  
CCCAGGTGCGGAGTTAGCCGCCGACTTTGAATTTAAATAAATCTCGTATAATGTATGCTATACGAAGTTATCCAGATCTGTA  
AGATAAACTCTAGAAATATTGGATCGTGGCACCGTACGCGCGTGGGAGGCGGCACGATCCGCGACGTGATGATCGGCC  
GCATCCCACGGTGTGCGCAGTGAAGTCTACGCCATCCCGCGTGGTGTGCGTTCCGACGCACAGGCCGGTGTG  
AGAAGGGTCTCTGACGAGCGGGAGAACCACCCGGGGTGGGCGAGTTGTCTGCGTGTGCTCGGTGCGAGTAGGCTCTG  
GGAGTACCCGTGTGTACGACCAGCAGGCATACATCTTGCAGCGCGAGAGATTCCGCGCCGAAATGAGCAGCATCCG  
CATGCTATAACAGAAAGGAGTTAATAATGTGGAAGGCGGAGGAGCTGTACCCGGCGTGTGCTCGGATCCTGGTGCAGC  
TGGACGGTGACGTCAACGGCCACAAGTTCTCCGCTCCTCGCGGAGGTTGAGGGCGACGCCACCTACGGCAAGTCCACCT  
GAAGTTCATCTGCACCACCGGTAAGCTGCCGTTCCGTTGGCCGACCCTGGTACCACCTGACCTACGGCGTCCAGTGCT  
TCTCCGCTACCCGGACCACATGAAGCGCCAGGACTTCTCAAGTCCGCCATGCCGGAGGGTACGTCCAGGAGCGCACCC  
ATCTCCTTAAGGACGACGGTAACATAAGACGCGTGCCGAGGTCAAGTTCGAGGGCGACACCCTGGTCAACCCGCATCGA  
GCTGAAGGGCATCGACTTCAAGGAGGACGGTAACATCTGGGCCACAAGCTGGAGTACAATAACTACAACTCCCAACGCTC  
ACATACCCGCGGACAAGCAGAGAAGACGGCATCAAGGCCAATCAAGACCCGCCACAACATCGAGGACGGTGGCGTCCA  
GCTAGCCGACCACTACCAGCAGAACACCCCGATCGGCGACGCGCCGCTGCTGCGCGGACCAACACTACCTGTCCACC  
CAGTCCGCCCTGTCCAAGGACCCGAACGAGAAGCGCGACACATGGTCTGCTGGAGTTCGTCACCGCCGCGGCATCA  
CCCACGGCATGGACGAGCTGTACAAGTAGATTTATACCAGCCGTCATCGTCAACGCCCTGATCCGCGGTGCGGACAGGC  
CGTGTGCGGACCGGCCGTGCGGAATTAAGCCGGCCCGTACCCTGTGAATAGAGGTCCGCTGTGACACAAGAATCCCTGTT  
ACTTCTCGACCGTATTGATTCGGATGATTCTACGCGAGCCTGCGGAACGACCAGGAATTCTGGAGCCGCTGGCCGCG  
GACCCCTGAGGAGTCCGGTGCAGGTGCGCGTGCAGGCTGCGGCGGAGAGCCTCGCGTCCGAGTCCGAGGCGGT  
GCGAGCCCGACCCGGTGTCAAGCTGTTCCGCGAGCACTGGTGCAGTCCGAGAGCCTCGCGTCCGAGTCCGAGGCGGT  
ACGCGGTCTGGCGGACGCCCGGTGCCGTTGCCCGCCTCCTCGGCCGCGGCGAGCTGCGGCCCGCACCCGGAGCC  
TGGCCGTGGCCCTACCTGGTGTGATGAGCCGGATGACCGGCACCACCTGGCGGTCCGCGATGGACGGCACGACCGACCGG  
AACGCGCTGCTCGCCCTGGCCCGGAACCTCGGCCGGTGTCTCGGCCGGTGCACAGGGTGGCCGTGACCGGGAACACC  
GTGCTACCCCCCATCCGAGGTCTTCCCGAAGCTGTGCGGGAACGCCGCGCGGCGACCGTTCGAGACCAACCCGGGT  
GGGCTACTCTCGCCCGGCTGCTGACCGCTGGAGACTGGCTGCGGACGTGCGCGGACGTGGACACGCTGACCGCCGCGC  
AACCCCGGTTGCTCCACGGCGACCTGCACGGGACCAACATCTTCTGGACCTGGCCGCGACCGAGGTACCCGGATCGT  
CGACTTACCGACGTCTATGCGGGAGACTCCCGCTACAGCCTGGTCAACTGCATCTCAACGCCCTTCCGGGGCGACCCG  
AGATCCTGGCCGCGCTGCTCGACGGGGCGAGTGAAGCGGACCGAGGACTTCGCCCGCGAAGTGTGCTCGCCTTCACTT  
CCTGCACGACTTCGAGGTGTTCCGAGGAGACCCGCTGGATCTCTCCGGTTCACCGATCCGGAGGAACCTGGCGAGTTCC  
TCTGGGGCCGCCGACACCCGCCCGCTGACGCCCGGGCCGCCCGCCGCGCCCGCCCGCCCGCCCGCCCGCCCGCCG  
TCGACCCAAGTACCGCCACCTAACAATTCGTTCAAGCCGAGTCCGGTTCGCCGGTCCCGGCCGCGGAGTTGTTCCGGTAAATTTGTAC  
AACGAATTCGATAAAATAAAAAGGGGACCTTAGGGTCCCCTTTTTATTTTATCGAATTCGAGCTCGAAGTTCCTATTCTC  
TAGACTGCAGGAACGCGTATAACTTCGTATAATGTATGCTATACGAAGTTATAATTAATCGACGGCTCGATCATGCCCGCC  
ATACCAGCCGCGGGCCGACGCGACGATCGCCATGATCGGCCACCGCGCCGCGGAGTTTCATCGCGACCTGAGCCGGC  
GGATCACCCGACGCTGTTGCCGTCGCGCCCGGTTCCCAAGTCCCGGTACGACCGCGGCCACCCGCAACCCGAACC  
CAGGATGATCAGGCCGACCCGCTCGCTCCAGCAAGCTGCGGACCTGCCGCGCTGCGGCGAGTGGCCAGTTCGGCAGTTC  
ATGTGCTGACCCGCGGTGAGCGCCTCGGCGAGTGAATTAAGCGCGGGTCCGCGTACGGCCTCGGGCATCGCGCGAGT  
GCGGGCGAGAGATGCCTCTGACTGCGCTGCGAGCACGGAACCGGCCACCGGATGCCGAGCGCCGCGGATCTCG  
CGCGTGGTGTCTGTTGACCGCGGACGCGACACCCTGTTTCTCGTCAAGTGGCGCGCCATGATGGCAGACGTACCCGGT  
CTGTGGACAGCCGACACCGATGCTCATGATGAACAGTGGCCAGGCGAAATCGAAGTAGGTGGAACCTGTTTCGAGTGTG  
CACATGCACCAACCCACCGCGGTGACCAGCAGGCGGAGGAATGCCGTGAGGCGCAGGCGGACGCGGCGAGTAC  
AGGTGCGTGGTGGCGCGAACGCAAGATGGGTACGACCAAGGGGCAAGGGCAGATAGCCGTGCGCAATCGGGCTGTAA  
CCATGATCAGCTGGATGTAAGTGCATGCTCAGCAAGAAGAACCAGGCGAAGGTCGCAAGAAGGAAACGTACCCCGCGGAG  
CCCGTCCGCAAAATTCGGGTGCGGAACAGGCGGACATCGAGCAGCGGGTGGGTGCGCCGCAACTGCACGGCGGTGAAC  
GCCGCGCCAGCGCGACACCGCCCGCCATCGCGCCCGACACCGACGGATGCGTCCACCCGCGCACCCGGAGCCTCGACA  
ACATGCAATGTTATTGCTCATGAGCGGATACATATTTGAATGTATTAGAAAAATGTTTAACTCGAGGGGGGGCCCGGTG

CTGTATTCGGTTGCAGAGAAACCGGATACACAGCGGACGTTGGGTACCTACGTTGCGTTCGAGAGACGAAGGCACCACGAT  
TACCGGCGCAGATGATATTCGCGGTCTACACCGGACGCTGGGGTATTGCGTTTGGCTCCGGGAAACCCGATCGCTTCGT  
TCAAAATCGGCGGAAGATACCCCGTGCCTGCGGTGCTGAAGGACCGCAAAGATGTTCCGACCGGACCGAGGTCTGCAAG  
TACGGGATGAAATCCGGCGAGACCTGTGGCCGCTGTTGTGGCTGCCAAGTACACGATCACCGCTCAGCTGCGCACCG  
TACATGGCGACTCAGGCGCGCCGCTGTACCGCAAGAACCGCGACGGCACAGCCGATTTGATCGGCATCGCTTCGAGCGTT  
AACGAGGACAGTCGCACGACGAAGTTCTTCTGGATCGCGCCCGTGTGGAAGCACTCAACCTCGAAGCGTGTGGTTGCGG  
AGCCATCTAGCAACCACACGAAACATGCGCAACGAACCGCGCAACGAACAACGCTAGAACTGGCCCTAGATGAGCTGAC  
TCGTATCGTTGGTAAACCTAGTTTGACCAGCATGTTTTAACTACGTTCCGTGAGCTGTCAACGGGGCCTGTACGGCACA  
CGAACCGTGAACGAGAGTGGCCACGGATGCCACCACAGGCACTACAACGGAGTTCGCCACGTACATCACACAACCACC  
GATTCTGGCGGTGAGCTCCCCGATATTCAGCGGAAATGGCTTGGTATCGACCAAGATTCTGAGAACCCCGTCTCGTCTGGC  
TGGTATTCAAACGGGCGCAACGAAACACGCAACGAGACAGGCATGGCCAAACCAGAAAATAGCGTCTACCAGGACTT  
TTACCTGTCCGACCCGTTGCAACGGAAACCCCGACGGAACCCCGCGACACCCGCTCCCAATTGCGTTAGAACAGCGGT  
GGATTGTCGGCTTCGTTGTGGGCCTTTGAGCCGCTTCTGTTCTGCCGACGCTCTTTCCTCGCCGATAGCCGAGTCCG  
TTAACGGTGTCCAGATGCAGCCGAAATGTTTGGCCGTTTGGCGCAAGAGTGGCCCTCGTGTGATAGGCGCGGAT  
GCTTTCGCGGCTGCGCAGCTGCTCGGCGAGCCATGAGGCGGGACGATAGGCCACAACCTGACGGAATCGAACAGTGC  
AGTCCGGTATTGAGCGCCTTCGGCGGGTACGCGCCGCTTTTTGCGGACAGTCCGCTGCCGTTGTAGCCGTCGC  
TGTAGCCGTCGCTGTAGCCGTCGCTCATAGCAATGCCTCCATGGCTGACGCGGACTTTGCGCGCCGCGCAACTGTGCTCG  
CCGCCGTGCGCGCTGCTGCCCTTCCGCGAGATGGCCGACTGGCGCGCACTGAGTGTGGCCTCGTAGACCACGATCCC  
GTCCGCCAAATGCGCGACTTGGTTGTATCCAACGCCAAATGCTGTTGGCGATGGCGCGGACCTCGCTGTCCGGTAGCG  
GTCCGGGACACACGCTGTTGCACGGGAATTCGGCGTTTCCGCGCTGGCACTCGGCATAGATCGCGCGGCCGAGTCCGTC  
CACGTTCCGGGTGCGCAGGTAGATCCGCATGAGGCGGGACGATAGGCCACAACCTGACGGAATCGAACAGTGC  
TTCCGCCCTAGCGCGTTCGAGCCGCTTTGACGTGGTCTGCTGACGCCAGCGCGGGTGGCATGTTCCGCGCGAGCT  
CGGCCTCGATGTGGCTGAGTGTGTAGAGATCTGAGTGGAGCCATTCCGTTTCCAGGCGATGTGGCCGGGTTTTGGTC  
ATGAGGCCTGAGTAACTGCGGTGCGCGTGCAGCGCGCGCCGAAGGCCTTCGGCGCACGCGCCCATGTATGCGAGCGGCT  
TACGCCGCGCTATTCCGGTGCCTGGAACAGGGGCGTTGAGTGCCACACTGCGTGTGCGTGGCCGTTGGCGGATTGCC  
CAGCATCGCTTGGCAGCGGATGGGACCCCGGGCGCTGAGCGCTCGGAGCGCTGCGTCTGGATGCTACGTCCAC  
GACCAGCAGTTTTGCCAGCGCTGTTGGTTCCGCTCGATGTACCGCGGGCTAGGGCCGACGCGCGCTTTGGCGGTAG  
ATCCCTCGAGCAGATCGTCCGTTGCCAGCGGCCAGTACGGCAGCCAGAGCTGCTCAAATTCGTCGGCGACGTGGCTCAC  
GCTTGGTAGTAGACCACGATTAATCACCGGTGTATGGTCCGACACGAGCTCCAAGTCAGATATTTGCTGAGGGGCCACCC  
CACAACCTGCACACTCCCCGCTCTCCCGTGCAGCCCTGGTGGTGAACACCAGCGACAGCCGAGCACCSCCAACACCT  
GTACCAACCAGGAGGAACACATGCGTCTGTTTCCGAGGACGTTTCCGGCCGCTGAGAGCCGCTGTGGCGCGGTACACGC  
CGCTTAGACCCGTTAGACCCCTGCGCCTGAATGCGCGGTTACGAGCCACACAGCGCCCGCTTACGGAGTGGTG  
GGCTCACCTGGCTTTATGGCGTACGAATCGGCTGTGTGCGACCTGTTGGGCGAGGTGAGGTACGCGCTACTCACGCTGGC  
AAGGGCGACACAGCCGCCACCAGGCCGCGACGGCGCGCGCGGTGTCAACAACCGGGTGTGCTGACACCCAGCA  
GGTGTTCGAGGCTTGGCTCGAAGTGCAGGACATCGTGGCGAACCGCCCGCATGAGCCGCGCCTTACGCTGGCTGCCAG  
CCGTTCCGGGGCTGGTTGGTGCAGCGCGTGCAGCGGTTAGAGGCCCTGCGGTGTTCCACCACCGCAGGCCTCGCCCTT  
TTAAGGCTGAATTTGCTTGTCTCCGAATCCAATGGCTTGTCCAAGGGTGTATCTACGCTTAATCCAAAGTTCAAACGAGG  
GATTACACATGACCAACTTCGATAACGTTCTCGGCTCGATACTCGTTCCACTGAGCGTACAGCCCGTAGAAAAGATCAAA  
GGATCTTCTGAGATCCTTTTTTCTGCGGTAATCTGCTGCTTGAACAACAAAAACCACCGCTACCAGCGGTGGTTTGT  
TGCCGGATCAAGAGCTACCAACTTTTTTCCGAAGGTAAGTGGCTTACGACAGCGCAGATACCAATACTGCTCTTAGT  
GTAGCCGTAGTTAGGCCACCATTCAAGAACTCTGTAGCACCAGCTACATACCTCGCTCTGCTAATCCTGTTACAGTGGC  
TGCTGCCAGTGGCGATAAGTCTGTCTTACCAGGTTGGACTCAAGACGATAGTTACCGGATAAGGGCGAGCGGTCCGGGT  
GAACGGGGGTTGCTGCACACAGCCAGCTTGGAGCGAACGACCTACACCGAAGTACGATACCTACAGCGTGTGCTATGA  
GAAAGCGCCACGCTTCCCGAAGGGAGAAAAGCGGACAGGATCCCGGTAAGCGGCAGGGTCCGAACAGGAGCGCGCAG  
AGGGAGCTTCCAGGGGAAACGCCTGGTATCTTTATAGTCTGTGCGGTTTCCGCCACTCTGACTTGTGCGTGTGATTTT  
TGATGCTCGTACGGGGGGCGGAGCCTATGGAAAAAGCCAGCAACCGCGCCTTTTTACGGTTTCTGGCCTTTTGTGGCC  
TTTTGCTCACATGTTCTTTCTGCGTTATCCCTGATTCTGTGGATAACCGTATTACCGCCTTTGAGTGTGCTGATACCGCTC  
GCCGACCGGAACCGACCGCAGCGAGCGGCGCTTATTTGTTAACTGTTAATTGCTTTGTTCAAGGATGCTGTCTTT  
GTAACAGATGTTTTCTGCTTTGATGTTTCCAGCAGGAACTGGCGCAAACGTTGATTGTTTGTCTGCTGAGAACTCTG  
TTTGTATATAGCTTGAATCACGACATTGTTTTCTTTGCTTGAAGTACAGCGAAGTGTGAGTAAAGTAAAGTTTACATCGTT  
AGGATCAAGATCCATTTTTAACACAAGGCCAGTTTTGTTACGCGCTTGTATGGGCCAGTTAAAGAATTAGAAAACATAACCA  
AGCATGTAATATCGTTAGACGTAATGCCGTAATCGTCAATTTTGTATCCGCGGGAGTACGTAACAGGTACCATTTGCCGT  
TCATTTTAAAGACGTTCCGCGGTTCAATTTTCTGTTACTGTGTTAGATGCAATCAGCGGTTTTCATCACTTTTTTCACTGTG  
TAATCATCGTTTGTGCTCAATCATACCGAGAGCGCGCTTGTAACTCAGCCGTGCGTTTTTATCGCTTTGCGAAGTTTTG  
ACTTTTGTACGGGAAGAATGATGTGCTTTTGCATAGTATGCTTTGTTAAATAAAGATTCTTCCGCTTGGTAGCCATCTTACG  
TTCCAGTGTGTTGCTTCAAATACTAAGTATTTGTGGCCTTTATCTTCTACGTAGTGAAGTCTCTCAGCGTATGGTTGTGCGCT  
GAGCTGTAGTTGCCTTATCGATGAAGTGTGACATTTTGTACGTTTTTCCGTCACCGTCAAAGATTGATTTATAATCCTC  
TACACGTTGATGTTCAAAGAGCTGTCTGATGCTGATACGTTAACTGTGCGATTGTCAGTGTGTTGTTGCCGTAATGTTTAC  
CGGAGAAATCAGTGTAGAATAAACGGATTTTTCCGTCAGATGTAATGTGGTGAACCTGACCATTTCTGTGTTGGTCTTTT  
AGGATAGAATCATTTGCATCGAATTTGCTGCTTTAAAGACGCGGCCAGCGTTTTTCCAGCTGCAATAGAAGTTTTCCG  
CGACTTTTTGATAGAACATGTAATCGATGTGATCCGCAATTTTTAGGATCTCCGGCTAATGCAAGACGATGGGTAGCC  
GTGATAGTTTGCAGACGTGCCGTGAGCGTTTTGTAATGGCCAGCTGTCCAAACGTCAGGCCTTTTGCAGAAGAGATATT  
TTAATTGTGGACGAATCGAATTCAGGAACTTGATATTTTTTCAATTTTTTGTGTTTCCAGGATTTGCAGCATATCATGGCGT  
TAATATGGGAAATGCCGATGTTTCTTATATGGCTTTTTGTTTCTTTTCCGAAACGCTTGTGTTGCGCCTCCTGCCAG  
CAGTGGCGTAGTAAAGGTTAACTGTTGCTTGTGTTGCAAACTTTTTGATGTTTATCGTTTCACTCTCTCTTTTATGACTG  
GTTGCGGCTGTTACTTCTTCCAGCCCTCTGTTTGAAGATGGCAAGTTAGTACGCACAATAAAAAAGCACTAAAATATGT  
AAGGGGTGACGCCAAAGTATAACACTTTGCCCTTTACACATTTTTAGTCTTGTCCCTGCTTTATCAGTAAACAAACCCGCGG  
TACTTTTTGACCTCATTCTATTAGACTCTGTTTGGATTGCAACTGGTCTATTTTTCTCTTTTGTGTTGATAGAAAATCATAAAA  
GGATTTGCAGACTACGGCCTAAAGAACTAAAAATCTATCTGTTTCTTTTCACTCTGATTTTTTATAGTTTCTGTTGCAT  
GGGCATAAAGTTGCCTTTTTAAATCACAATTCAGAAAATATCATAATATCTCATTCTACTAAATAATAGTGAACGGCAGGTATAT  
GGTCCGAGCAAGACGTTTCCCGTTGAATATGGCTCATAACACCCCTGTATTACTGTTTATGTAAGCAGACAGTTTTATTGTT

ATGATGATATATTTTTATCTTGTGCAATGTAACATCAGAGATTTTGAGACACAACGTGGCTTTCCCCCCCCCCCCCGACGT  
CAGGTGGCTAGAAATGTATCCTAAATCAGAT

>pPG23

GGCCGCGGTACCAGATCTTAAATCTAGATATCCATGGTCCGACATCTCTCACACCCCCTCTTCCATTCTGGCACTCGATGC  
CATATATTTGCGATCTCGATCACAACGTGTCGAGACCATACGCGACGAAAGGGAGTCCACATGGAACCGAATCAGCACGTGC  
AGGCCGAGACCGAACTCGTCAACGAGACTCTCGTGGAAAGAGGTCTCGATCGACGGTATGTGCGGGGTCTACTGACCGTGT  
CCACTCAGGTGCGCGAACAGATCACCTTCGACCCGGATGTGAGCTGGCGTCTGCACCATCAGGTCGCGGTTTCGGCCGGA  
GCCGTTTCGGCGCCCTGCTGTACCACCTTCGGGACGCGCAAGCTGTCTGTTCCCTGAAGAACCAGACGGTCTGTCGAGGTGGTC  
AACTCGCTGGCTGACCACCCCGACGCCCCGGTCCGGCGCTGTGCGCCGCGGGGGTCCGCCGACGATCAGCAAGCGCCCTAT  
CTGCACGCACTTGGCGTCTGTCAGTCAACATGCTCGTACCCGGGAATCCCGAAGGATCGCAATGACTTTCAGTTCAG  
CCCGTGCCTCGTTCGAAACAGTTCGAGCGCGGACTCGACGCGCCGATCGCCTACCTGGGAGTCCACTACGCTACGCGT  
GCAACCTCGCGTGTGTCCACTGCCTGTCTCGTGGGCAAGCGCGACCCGCGGGAGTTGTGACGCGAGCAGTGCAAGGA  
CATCATCGACGAGCTCGAACGCATGCAGGTGTTCTACGTGAACATCGGCGGCGGGGAGGCCACCGTGCCTCGGACTTCT  
GGGAGCTGGTCTGACTACGCCACCGCACACCACGTCCGAGTCAAGTTCCTCCACCAACGGCGTTCGGATCAGCCCCGAGT  
CGCCGCGAAGCTCGCGGCCAGTGACTACGTGACGCTCCAGATCTCGCTGGACGGCGCCAACGCCGAGGTGAACGACGCC  
GTGCGCGGCAAGGGCTCGTTGACATGGCCGTGCGCGCGCTGGAGAACCCTGAGCAACGCAGGCTTACCAGCGCCAAGA  
TCTCGTGGTCTGTCACGCGCAGACGTGACCCAGTCCGCAAGTTCGCGCGCTGGCAGCACGTTACGGCGCCACACT  
GCGCATCACGCGGCTGCGGCCGTCCGGTCCGGGCGCGGATGTGTGGGACGATCTGCATCCCACCGCCGAACAGCAGCG  
CCAGCTGTACGACTGGCTCGTGGCCAAGGGTGACCGTGTGCTCACCGGCGACTCGTTCCTCCACCTGTCCGGGCTCGGC  
GCACCGGGTGCCTCGCGGGTCTGAACCTGTGCGGCGCAGGCCGCGTGGTGTGCTGATCGACCCGGTCCGGCGACGTC  
TACGCTGCCCGTTCCGCGATCCACGACAAGTTCCTGGCCGGAACATCCTGTCCGACGGTGGTTCCAGAACGCTGGCA  
GACTCCGAGCTGTTCCGCGAATCGCGAACCGAGTCCGCGCGTCCGCAAGCTGCGCAAGCTGCGGACTCCGACGCTGCG  
CGCGTGGTGCATGGCCCGCAAGTTCCTCACGGGCTCGCGCTCGACGCCCCGACCCCGAATCGCTCGAGGGCTGG  
GGCGCCCCGGCACTGGAGAAGGAACCGGTCAAACCCAAGCCAGCGGTGACCACTCGCGGGGACCAAAACAAGGGCCG  
GTGGCGTTGAAGCTGCTGACCAAACCCCGGCCCGTTCGCAACGAAAGTCCGGTGTGAACATGGCACGAGACATCTGG  
TTCGAGACCGTTGCGATCGCCAGCAAAGGGCCCGCAAGCGGCTTCGAAATCCGCTATTCCTCGCTCATCTCCGCGAG  
CGAGAAGGGCGTGACGGTCAACGACAACGTGAGTCTTCGCGGAGTCCGTTTCGCACCGCAGCTGGTGGGTGCGCCC  
GAGAGCGCGACATGGCCACCCAGTGTGAGGGCAACAGATTTCTGGTCCGCGTATCATCTCGCCGACGCGGCTGCGAG  
CCGTGCACCCGACGCGAGGTGCGCGTTCGCGGGCCGCGCGCGCGGTACCGCTATGGTCTGTCTCGTTTTCG  
CCAGCAAGCCGATCGAAGAGGTGTCGCGGTCAAACGACAAGATCTTCTCCAGATCTACTGGTGGGTGACCGTGACGCG  
ATCCTCGCTCGTCCGAGCGCGCAAGGCAGCGGGTCCGCTCGGTCTGATCGTACGACCGACTGGAGCTTCAGTCACG  
GCCGTGACTGGGGGAGTCCCAAGATCCCGGAGAAGATGGATCTGAAGACGATGGTTCACGATGATGCCGAGGCGCTGAC  
CAAGCCGCGCTGGCTGTGGCAGTGGGGCAAGACCATGCGTCCGCCGAACCTTCGGTGCCCAACAGGGGGCGCGCGG  
CGAGGACGGCCCGCTTCTTTCAGGCCTACGGCGAGTGGATGGGCACGCCCCCGCCGACCTGGGAGGACATCGCCTG  
GCTGCGCGAGCAGTGGGACGGGCCGTTTCATGCTCAAAGGGCGTATCCGCGTGCACGACGCCAAACGTGCTGTTGACGCG  
GGCGTTTCGGCGATCTCGGTGTCCAATCACGGTGGCAACAACCTGGACGGCACACCCGCGGCCATTTCGCGCCCTGCCGG  
TGATCGCGAAGCGGTGCGCGACCGAGGTGAGGATTTGCTCGACGGTGGCATCCGCCGCGGACGAGTGTGCTCAAGGC  
TGTCGCGCTGGGTGCGCGTCCGGTGTGATGATCGGACGCGCTACCTGTGGGGTCTGGCCGCCGAGGGGACGGTCCGGGT  
CGAGAATGTGCTCGACATCTGCGCGGAGGTATCGACTCGCGCTGATGGCCGCGGCGTTCGTCGATCCACGATCTG  
GTTCCCGAGGACATCCTCGTCCCGGAGGGCTTACCCGCGCGCTGGGTGATCCGCCCGCATCCGGTTCGTGAGTCTC  
CCGCGGGGCGTGACAGGGGTGGCAGAAGGGGCGCACGGGATGCGCCCCCTTTCGCGACGGAACACTGACGGGAAATCG  
AACACTGCGTATGCGCGAACATCTGGCGCACGCCAGGTGAATTCGGTACCATCGGCACGTGGCTTTTCCAGCGGGCT  
CGGGACCTCGACGTGAGGCGACTACACAGCATGGTCCGATGGTGTTCGCGTTCGCGTTCACCCGAACAGCATGGTC  
CGCACCTGCCGCTGGACACCGACACAGGATCGCGGACGCTGTGGCCGGCACCGTGGTTCGAGCAGTTTCGGCGCGCCCG  
CCGACCGCACGCGGTGGTGGCCCTCCGGTGGCTACGGCGACGCGGCGAGCAGGAGATTCCCGGACACCGCTCT  
CGATCGGCACCGCCGCTGAGCTTTTGTGCTGAATAACGGCAGGTCCGGCTGCAAGTGGAGCTTCGATCTCGATCTCTT  
GTCAACGGTACGCGGTAACGTGAGGCCCTCGCCGCGGCCGTCGCGTGTGCGCTACGAGGGCCGCGACGCCGGC  
TGGGTGCCGTGACGCTGCCCGACCGCATGCGCACGCGGGCCACCCGAACGTCCGTAAGTCTACATATTTACCCG  
ACGATGTATTGACCGACGAGCTCGTGTGCGGTAATACGGCCCCGTTGGCGGAGCTGATGCCGCGCATGCGCAGTGGCGG  
TGTCGCGGCCGTCAGCGAATCGGGATTCTGGGTGACCCGACGACCGCGACAGCCGCCGAAGGGAGCGTATCTTTGCT  
GAGATGGTCAACGCTGCGCCGACCGGATCAAGCGGTGGCAGCCGACCCGGAACGATTGCTGACATGACCCGACCGAG  
ACTGCCCGACGTTTTGCGGTGACGTTGATCGCGGAGTCAAGGTGCTCGGAGAGGGCGCGGCGTTCGTTGGCGGCTCA  
CCGACCCGCTGCTGCGGTTGGCGCCGACGGCCAGAACATGCTCAGCGGGGGCCGCTCGAGGTTACGACGCGGTG  
TCCGCGAACTCGCGCGAACCTCCTGGACGCGACCGTCCGCGCATCCGCGGCTGCCAGCGGGCCGTTCCATCTGGAC  
GTCACAGTGGTTGTCCTCCGTACGGGACAACGCATCCGGCTGCACCCGCTGATGGCGGCGCTGCGCGGGCTGCGCGTGA  
TCGTGGTGCAGGACGGCTCGGCGATCCCGGTGCAACCGTCCGACTTCTCCGGTATGCACTGCGACGTGCAGGTGCTGCG  
GCACACCCGACGCAACCGCCCGCGCCGCGTAACACCGCCCTTCGCTCGTGCAGACGAGATTTCGTTGGCTTCCTC  
GATTCGACGTTGGTCCCAAGCGTGGTTGGCTCGAGGCGCTGCTCGGGCATTCTGCGATCCGGCCGTGGCACTGGTGG  
CGCCCCGATCGTGGTCTGCACAACCGCCGACAACATCGTGGCCCGGTACGAGTCCGTCGATCCTCGCTGGACCTCGG  
GGTGCGCGAGGGCGCCCGTGGTCCGCGACGGCACGGTGTGCTATGTCCGAGCGCGGATCATCTGCAGGCGGTCCGGC  
GCTCGTGGAAAGTGGCGGGTTTCGACGAGACCATGCACTCGGGGGAGGATGTGACCTGTGCTGGCGCCCTGGTCCAGTGC  
GGCGCCGCTGCTGCTTACGAACCGATCGCCCTGGTGGCGCACGATCACCACCAACCTGCGAGCGTGGTTCACCGCA  
AGGCATCTATGAACTCGCGCCGCTCCGCTGACGTTGCGCCATCCCGGTAAGACGTCGCGGATTCGCGGTTTCGCGG  
GACGCTGATGGTGTGGTGTGCTCGGGGTGGGCTCGTTCTTCGGCTACCTCGCTCGCTCGCGGCGGGGTTTCGCG  
GGTACCCGATCGCGCGGGCGCTCAGCGTCTGAGACCGAACCAAGGAGTCCGCGTGGTCCGCGCCCGACGGCCTG  
TGGTCTCGCGGTTTCAGATTGTGTTCCGGGATCTGTGCGCACTACTGCCCCATCGCGATGATCGCGGCGGTGCTGTTCCG  
CCGGGCGCGGCGACGCGGTGCTGGTGGCCGCGGTGGTGGAGCTGTTGCTGACTGGTGGTGCAGCGACGCGGCAACCGCCG  
ACGACGACCAACCCGTCGACTGCTCACCCATCTGACTCAAGCGACTGGACGATCCGCTACGCAACCGCTCTG  
TGGACCGCGTGGTGCAGGACTCACCTCGCGCGCTCAAGCCCCAGGTGCGGAGTTAGCCCGCCGTTGAAAGCTT  
ATCGATGTGACGAGTAACTAGCGTACGATCGACTGCCAGGCATCAAATAAACGAAAGGCTCAGTCGAAAGACTGGC

CTTTCGTTTTATCTGTTGTTTGTCCGGCCATCATGGCCGCGGTGATCAGCTAGAGCCGTGAACGACAGGGCGAACGCCAG  
CCC GCCGAGGGGTTCCGACCCGTCGCAACTCCCGGTGCAACCTTGCCCGGTCTATTCTTCTCACTGACCCAGCTC  
CAATCTGGTGTGAATGCCCTCGTCTGTTCCGCGAGCGGGGGCTCTATTCTGTTGTACAGCTGAAAGTAGCCAGATCA  
GGGATGCGTTGCAACCGCGTATGCCAGGTCAGAAGAGTCGACAAGAGTTGCAGACCCCTGGAAGAAAAATGGCCAGA  
GGGCGAAAACACCCTCTGACCAGCGGAGCGGGCGACGGGAATCGAACCCGCGTAGCTAGTTTGAAGAATGGGTGTCTG  
CCGACCACATATATGGGCCGGTCAAGATAGTTTTTACCCCTCTCGGCTGCATCTTAAGTGGAAAGAAATTGCAGGTC  
GTAGAAGCGCGTTGAAGCCTGAGAGTTGCACAGGAGTTGCAACCCGCTAGCCTTGTTACGACGAGAGGAGACCTAGTTG  
GCACGTCGCGGATGGGGATCGCTGAAGACTCAGCGCAGCGGGAGGATCCAAGCCTCATACTGCAACCCGACGAGCGGTG  
TGAGGTACTACGCGCTGCAGACCTACGACAACAAGATGGACGCCGAAGCCTGGCTCGCGGGCGAGAAGCGGCTCATCGA  
GATGGAGACCTGGACCCCTCCACAGGACCGGGCGAAGAAGGCAGCCGCCAGCGCCATCACGCTGGAGGAGTACACCCG  
GAAGTGGCTCGTGGAGCGGACCTCGCAGACGGCACCAGGGATCTGTACAGCGGGCACGCGGAGCGCCGCATCTACCC  
GGTGTAGGTGAAGTGGCGGTACAGAGATGACGCCAGCTCTGGTGCCTGCGTGGTGGGCCGGGATGGGTAGGAAGCA  
CCCGACTGCCCGCCGGCATGCCTACAACGCTCTCCGGGCGGTGATGAACACAGCGGTGAGGACAAGCTGATCGCAGAG  
AACCCGTGCCGGATCGAGCAGAAGGCAGCCGATGAGCGCGACGTAGAGGGCGTACGCGCTGAGGAGCTGGACATCGTC  
ACCAATCTATGCTTTGATGGGAAGCCCGATCGCGGCATACCTCTGGCTGGACGAGCCTCCGATGTCGAGAGCTGATCG  
AGTTCTGCCGCAAGGACATCGTGGACGACGGCATGACGATGAAGCTCCGGGTGCGCCGTGGCGCTTCCGCGTGGGGAA  
CAAGATCGTCTGGCAACGCCAAGACCGTCCGGTGAAGCGTCTGTGACGGTCCGCCTCACGTCGCGGAGATGATCC  
GAGCGCACATGAAGGACCGTACGAAGATGAACAAGGGCCCCGAGGCATTCTGGTGACCACGACGCGAGGGCAACCCGGCT  
GTCGAAGTCCGCGTTACCAAGTCGCTGAAGCGTGGTACGCCAAGATCGGTGCGGCCGAACTCCGCATCCACGACCTCC  
CGCTGTGCGCGCTACGTTCCGCGCTCAGGCAGTGCAGACCAAGGAGCTGATGGCCGCTCGTGTACACGACTCC  
TAGGATGCGGATGAAAGTACAGATGGCGTCTGAGGCCGCGACGACGAGGCTATCGCTGAGGCGATGTCCAAGCTGGCCAA  
ACCTCTGAAACGCAAAAAGCCCCCTCCCAAGGACACTGAGTCTAAAGAGGGGGTTTCTGTACGTACGCGAAGAAC  
CACGCTGGCCGCGAGCGCCAGCACCGCGCTCTGTGCGGAGACCTGGGCACCAGCCCCGCGCCGCGCAGGAGCATTG  
CCGTTCCCGCCAGCTAGCAACAAAGCGACGTTGTGTCTAAAATCTCTGATGTTACATTGCACAAGATAAAAATATATCATC  
ATGAACAATAAAACTGTCTGCTTACATAAACAGTAATAACAAGGGGTGTTATGAGCCATATCAACGGGAAACGTCTGTGTCG  
AGGCCGCGATTAATCAACATGGATGCTGATTTATGGTATAAATGGGCTCGGATAATGTCCGGCAACTCAGTGC  
ACAACTATCGCTTTGATGGGAAGCCCGATCGCGGCAGATTTGTTCTGAAACATGGCAAAAGGTAGCCTTCCAATGATGTT  
ACAGATGAGATGGTACACTAACTGGCTGACGGAATTTATGCCTCTCCGACCATCAAGCATTATCCGTAATCCTGATG  
ATGCATGTTACTCACCCTGCGATCCCCGGGAAAACAGCATTCCAGGTATTAGAAGAATATCCTGATTCAGGTGAAAATAT  
TGTTGATGCGCTGGCAGTGTCTGCGCCGGTTGCATTCCGATTCCTGTTTGAATTGCTTTTTAACAGCGATCGCGTATTT  
CGTCTCGCTCAGGCGCAATCACGAATGAATAACCGTGGTGGTGTACGCGAGTATTTGATGACGAGCGTAATGGCTGGCCT  
GTTGAAACAAGTCTGGAAGAATAATGCATAATCTTTGCCATTCTACCCGATTAAGTGCCTACTGATGGTATTCTCACTTGA  
TAACCTTATTTTTGACGAGGGGAAATTAATAGGTTGATTGATGTTGGACGAGTCCGAATCGCAGACCGATACCAGGATCTT  
GCCATCCTATGGAAGTGCCTCGGTGAGTTTTCTCTTATTACAGAAACGGCTTTTTCAAAAATATGGTATTGATAATCCTGA  
TATGAATAAATTGCAGTTTCATTGATGCTCGATGAGTTTTTCTAATCAGAATTGGTTAATTGGTTGAACACTGGCAGAGCA  
TTACGCTGACTTGACGGGACGGCGGCTTTGTTGAATAAATCGAATTTTTGCTGAGTTGAAGGATCAGATCACGCATCTCCC  
GACAACGACAGCCGTTCCGTGGCAAAGCAAAGTTCAAATCACCAACTGGTCCACCTACAACAAAGCTCTCATCAACCGT  
GGCTCCCTCACTTTCTGGCTGGATGATGGGGCGATTACGGCTGGTATGAGTCAGCAACACCTTTCACAGGGCAGACC  
TCACTAGTTCCTACTGAGCGTCAGACCCCGTAGAAAAGATCAAAGGATCTTCTTGGATCCTTTTTTCTGCGCGTAATCTGC  
TGCTTGCAAAACAAAAAACCCGCTACCAGCGGTGGTTGTTGCGCGATCAAGAGCTACCAACTCTTTTTCCGAAGGTAA  
CTGGCTTACAGCAGAGCGCAGATACCAATACTGCTCTTAGTGTAGCCGTAGTTAGGCCACCACTTCAAGAACTCTGTAG  
CACCGCCTACATACCTCGCTCTGCTAATCCTGTTACCAGTGGTGTGCCAGTGGCGATAAGTCTGTCTTACCAGGGTTGG  
ACTCAAGACGATAGTTACCAGGATAAGGCGCAGCGGTGGGCTGAACGGGGGTTCTGTCACACAGCCAGCTGGAGCG  
AACGACCTACACCGAAGTACGATACCTACAGCGTGAGCATTGAGAAAAGCGCCACGCTTCCCGAAGGGAGAAAAGCGGACA  
GGTATCCGGTAAGCGGCAGGGTCCGAACAGGAGAGCGCACGAGGGAGCTTCCAGGGGAAACGCCTGGTATCTTTATAG  
TCCTGTGGGTTTCCGACCTCTGACTTGAGCGTCGATTTTTGTGATGCTCGTCAGGGGGCGGAGCCTATGAAAAACG  
CCAGCAACGCGGCCCTTTTTACGGTTCTGGCCTTTTGTGCTGCTTTCCTGCTCATATGTTCTTCTGCGTTATCCCTGATTC  
TGTGGATAACCGTATTACCGCTTTGAGTGAAGTGTATACCGCTCGCCGACGCCGAACGACCGAGCGCAACGCGTGC

>pPG29

GGCCGCGGTACCAGATCTTAAATCTAGATATCCATGGCTCTCACACCCCTCTTCCATTCTGGCACTCGATGCCATATAT  
TGCGATCTCGATCACAACTGTGAGACCATACGCATATGGAGTTAGCCGCGACTTTGAGTGTGTTGATCGTCCGGCG  
GGGACGCGCCGATCGGTGTTGGCCGAACGCCTTTCCGCGGACCCGAGCTGTGAGGTGACGGTGGTGGAGGCCGGCCC  
GGCCCCGTCCGATCCGCGGGTGGCCGCGCAGATCACCGACGGCGTGGGCTACCCATCGGCGCCGCGAGTTCCGTGGT  
GCGGCACTATGGTGCAGCCTGACCGAGGATCCGCCGCGGCGACCGAGATCATCCGCGGTTCCGGTGGTGGCGGCTC  
CGGAGCGGTCAACGGTGGCTATTTCTGTGCGGCGCTGCCACCGACTTACCCGCTGGGCGGTTCCCGGATGGAGCTGG  
GACGATGTGCTGCCCCATTTCCGTGCGATCGAGACCGACCTCGACTTCCGCCACCGCGCTGCAGGCTCCGAAGGTCCGAT  
CAAGGTGCGCCGGTCCACGAATTCGACGGGTGACCCGCGCAATTCGTCAGCAGCCGATCCGCGCCGGGATGGCTGG  
ATCGACGATCTCAACGGGTCCGATGCCGACGCGGCTTGCACCCGCGGTTGGCGCGGTGCCGCTGAACATCGACGGCG  
GAACCCGTCTCGACCCGGAGGGCCTACCTGCAGCCCGCACTCGACCGGCCAATCTGCATCTGCGCGCCGACACCCG  
GGTGCCTGCGCTGCTGGTGCAGCATGATGCCGCGGTGGGTGTGGAATGCGTCGACGGTGAATCCTGTACGAGATCGA  
ATCGTGTGTCGCGCGGGCCATCGGCTCGGCACATCTGTTGCTGCTCTCAGGCATCGGGCCGGCGGGGACTTGGCGG  
CCCACGGGATCGCGTGGCGGCAACCTACCTGTGGGACGGCAGTGCAGCACCCGGAGTGGGTGCTGCCGTGG  
CCTGGACCCCAACATGACCTGCCCGCTGGAAGCGTGTCTACACCGGCCGACCGCATCGAGATCCGCGCCGACAC  
CGCGGGTTTCTCGGCGCTGGTGCAGGGCCGAACACGACCCGGCCGAACCTCCACATCTCGGTGTGCGGCTCATGCGT  
CCGATTCACGGGGCAGGGTGGCTCTCGGCTCGGCGGATCCGGCCGTGCCCGGATCATCGAACACCGTTACGACACGG  
TCGACGGGGATGTGACGCGCTGCGCGCGGGCGCCGAACCTCGCCCGCAATTTGTAAGTACGCAAGTCAAAGTGGGG  
AGGCCTCTGGTGCAGTTCGACGACCTCGCGGGGACCGCGCTGAGTGGCAGGGGCAAGGCGTGGTGGACCCGA  
CGTCCGGGTACTCGTGTGCGAGCGGTTGTGGTGTGCGAGGCTCGATGATGCCCCCATCACAGCGCGGGCCGCA  
CGCGACGATCGCATGATCGGCCACCGCGCGGAGTTATCGCGACCTGAGCCGGCGGATCACCCGACGCTGTTAAG  
CTTATCGATGTGACGATGTTAACTAGCGTACGATCGACTGCCAGGCATCAAATAAACGAAAGGCTCAGTCGAAAGACTG

GGCCTTTCGTTTTATCTGTTGTTTGTCCGGCCATCATGGCCGCGGTGATCAGCTAGAGCCGTGAACGCAGGGCGAACGC  
CAGCCCGCCGACGGCGAGGGTTCGACCCGCTGCAACTCCCGGTGCAACCTTGCCCGGTCTATTCTCTTCACTGCACCAG  
TCCTCAATCTGGTGTGAATGCCCTCGTCTGTTCCGCGAGCGGGGGCTCTATTCTGTTGCAGCAGGAAAGTAGCCAG  
ATCAGGGATGCGTTGCAACCCGCGTATGCCAGGTGAGAGAGTGCACAAAGAGTTGCAGACCCCTGGAAAGAAAAAGGGC  
CAGAGGGCGAAACACCCTCTGACCAGCGGAGCGGGGCGACGGGAATCGAACCCGCGTAGCTAGTTTGAAGAATGGGTG  
TCTGCCGACCACATATATGGGCCGGTCAAGATAGGTTTTACCCCTCTCGGCTGCATCCTCTAAGTGGAAAGAAATTGCA  
GGTCTGAGAGCGCGTTGAAGCCTGAGAGTTGCACAGGAGTTGCAACCCGGTAGCCTTGTTACAGCAGAGAGGAGACCTA  
GTTGGCACGTCGCGGATGGGGATCGCTGAAGACTCAGCGCAGCGGGAGGATCCAAGCCTCATACTCAACCCGACGAC  
GGTGTGAGGTACTACGCGCTGCAGACCTACGACAACAAGATGGACGCCAAGCCTGGCTCGCGGGGAGAAAGCGGCTCA  
TCGAGATGGAGACCTGGACCCCTCCACAGGACCGGGCGAAGAAGGCAGCCGCCAGCGCCATCACGCTGGAGGAGTACAC  
CCGGAAGTGGCTCGTGGAGCGGACCTCGCAGACGGCACCAGGGATCTGTACAGCGGGCAGCGGAGCGCCGATCTA  
CCCGGTGCTAGGTGAAGTGGCGGTACAGAGATGACCCAGCTCTGGTGCCTGCGTGGTGGGCCGGGATGGGTAGGAA  
GCACCCGACTGCCCGCCGGCATGCCTACAACGTCTCCGGGCGGTGATGAACACAGCGGTGAGGACAAGCTGATCGCA  
GAGAACCCTGCCGGATCGAGCAGAAGGCAGCCGATGAGCGCGACGTAGAGGGCGTGCAGCCTGAGGAGCTGGACATC  
GTCGCAATCTATGCTTGTATGGGAAGCCCATGCGCCAGAGTTCTTCTGAAACATGGCAAAGGTAGCCTGGCAAGCTGAT  
CGAGCTTCCGCGCAAGGACATCGTGGACGACGGCATGACGATGAAGCTCCGGGTGCGCCGTGGCGCTTCCCGCTGGG  
GAACAAGATCGTCTGGCAACGCCAAGACCGTCCGGTCAAGCGTCTGTGACGGTTCGCGCTCACGTCGCGGAGATGA  
TCCGAGCGCACATGAAGGACCGTACGAAGTGAACAAGGGCCCCGAGGCATTCTGGTGACCACGACGCAGGGCAACCG  
GCTGTGCAAGTCCGCGTTCACCAAGTCTGCTGAAGCGTGGTACGCCAAGATCGGTGCGCCGGAACCTCCGATCCACGAC  
CTCCGCGTGTGCGGCTACGTTCCGCGCTCAGGCAGGTGCGCAGCAGCAAGGAGCTGATGGCCGCTCGGTCACACGA  
CTCCTAGGATGGCGATGAGTACCAGATGGCTGCTGAGGCCCGCAGCAGGCTATCGCTGAGCAGCCTCGGATGCTCAAGCTGGC  
CAAGACCTCTGAAACGCAAAAAGCCCCCTCCCAAGGACACTGAGTCTAAAGAGGGGGTCTTGTGACGTACGCGAA  
GAACCACGCTGGCCGCGAGCGCCAGCACCAGCGCTCTGTGCGGAGACCTGGGACACGCCCCGCGCCGCGCAGGAGC  
ATTGCCGTTCCCGCCAGCTAGCAACAAGCGACGTTGTGCTCAAAATCTCTGATGTTACATTGCACAAGATAAAAATATAT  
CATCATGAACAATAAAACTGTCTGCTTACATAAACAGTAATAACAAGGGGTGTTATGAGCCATATTCAACGGGAAACGTCTTG  
CTCGAGGCCGCGATTAATTAACATGGATGCTGATTTATATGGTATAAATGGGCTCGCGATAATGTCGGGCAATCAGG  
TGCGCAATCTATGCTTGTATGGGAAGCCCATGCGCCAGAGTTGTTTTCTGAAACATGGCAAAGGTAGCCTGGCAATGA  
TGTTACAGATGAGATGGTCAGACTAACTGGCTGACGGAATTTATGCCTCTTCCGACCATCAAGCATTATCCGACTCCT  
GATGATGCATGTTACTCACCCTGCGATCCCCGGGAAAACAGCATTCCAGGTATTAGAAGAATATCCTGATTCAGGTGAA  
AATATTGTTGATGCGCTGGCAGTGTCTGCGCCGGTTCGATTCGATTCTGTTTGTAAATTGCTTTTTAACAGCGATCGCG  
TATTTGCTCGCTCAGGCGCAATCACGAATGAATAACGGTGGTGGTATGCGAGTGATTTTGTGACGAGCGTAATGGCT  
GGCCTGTTGAACAAGTCTGGAAAGAAATGCATAAATCTTTTGCCTTCTCACCAGGATTGATGCTCACTCATGGTATTCTC  
ACTTGATAACCTTATTTTTGACGAGGGGAAATTAATAGTTGATTGATGTTGGACGAGTCCGGAATCGCAGACCGATACCAG  
GATCTTGCCATCCTATGAACTGCCTCGGTGAGTTTTCTCTTACATTACAGAAACGGCTTTTTCAAAAATATGGTATTGATAA  
TCCTGATATGAATAAATTGCAGTTTCATTTGATGCTCGATGAGTTTTCTAATCAGAATTGGTTAATTGGTTGTAACACTGGCA  
GAGCATTACGCTGACTTGACGGGACGGCGGCTTTGTTGAATAAATCGAATTTTTGCTGAGTTGAAGGATCAGATCACGCAT  
CTTCCCGACAACCGCAGACCGTTCGTTGGCAAAGCAAAAGTTCAAATCACCCTGATCCACCTACAACAAGCTCTCATC  
AACCTGGCTCCCTCACTTTCTGGCTGGATGATGGGGCGATTGAGCCTGGTATGAGTACGCAACACTTCTTACAGG  
CAGACCTCACTAGTTCCTGAGCGTACAGCCCGTAGAAAAGATCAAAGGATCTTCTGAGATCCTTTTTTCTGCGCGTA  
ATCTGCTGCTTGAACAACAAAAACCACCGTACCAGCGGTGGTTTGTGGCGGATCAAGAGCTACCAACTCTTTTTCCGA  
AGGTAACCTGGCTTACAGCAGAGCGCAGATACCAATACTGCTTCTAGTGTAGCCGTAGTTAGGCCACCACTTCAAGA  
CTGTAGCACCCTACATACCTCGCTCTGCTAATCCTGTTACCAGTGGCTGCTGCCAGTGGCGATAAGTCTGTCTTACC  
GGTTGGACTCAAGCAGATAGTTACCGGATAAGCGCAGCGGTGCGGCTGAACGGGGGTTCTGTCACACAGCCAGCTT  
GGAGCGAACCGACTACACCGAAGTACAGTACCTACAGCGTGAAGCATTGAGAAAAGCGCCACGCTTCCCGAAGGGAAAGG  
CGGACAGGTATCCGGTAAGCGGCAGGGTCCGGAACAGGAGAGCGCACGAGGGAGCTTCCAGGGGAAACGCCTGGTATCT  
TTATAGTCTGCTGGGTTTCCGACCTCTGACTTGAAGCGTCAATTTTGTGATGCTCGTCAAGGGGGCGGAGCCTATGGAA  
AAACGCCAGCAACGCGGCCCTTTTTACGGTTCCTGGCCTTTTGTGCTGGCCTTTTGTGCTCACATGTTCTTCTGCGTATCCCT  
GATTCTGTGGATAACCGTATTACCGCCTTGTAGTGAGCTGATACCGCTCGCCGACGCCAAGCAGCGCAACGCGTG  
C

>pPG32

TGTCTCAAAATCTCTGATGTTACATTGCACAAGATAAAAATATATCATCATGAACAATAAAACTGTCTGCTTACATAAACAGTA  
ATACAAGGGGTGTTATGAGCCATATTCAACGGGAAACGTCTTGCTCGAGGCCGCGATTAAATTCACATGGATGCTGATTT  
ATATGGGTATAAATGGGCTCGGATAATGTCGGGCAATCAGGTGCGACAATCTATCGTTGTATGGGAAGCCCATGCGCC  
AGAGTTGTTTCTGAAACATGGCAAAGGTAGCGTTGCCAATGATGTTACAGATGAGATGGTCAGACTAACTGGCTGACGGA  
ATTTATGCCTCTCCGACCATCAAGCATTATCCGTACTCCTGATGATGCATGGTACTCACCCTGCGATCCCCGGGAAA  
ACAGCATTCCAGGTATTAGAAGAATATCCTGATTGAGTGAAGTAAATTTGTTGATGCGCTGGCAGTGTCTGCGCCGGTTGC  
ATTCGATTCCTGTTTGAATTTGCTTTTTAACAGCGATCGCTATTTCTGCTCGCTCAGGCGCAATCAGAAATGAATAACGG  
TTTGGTTGATGCGAGTATTTTGTGACGAGCGTAATGGCTGGCCTGTTGAACAAGTCTGGAAAGAAATGCATAAATCTTTG  
CCATTCTCACCAGGATTGAGTGCCTCATGGTATTTCTACTTGATAACCTTATTTTTGACGAGGGGAAATTAATAGTTG  
TATTGATGTTGGACGAGTCCGGAATCGCAGACCGATACCAGGATCTTGCCATCCTATGAACTGCCTCGGTGAGTTTTCTCC  
TTCATTACAGAAACCGCTTTTTCAAAAATATGGTATTGATAAATCCTGATATGAATAAATGCAAGTTTCAATTTGATGCTCGATGA  
GTTTTCTAATCAGAATTTGTTAATTTGTTTAACTGGCAGAGCATTACGCTGACTTGACGGGACGGCGGCTTTGTTGAA  
TAAATCGAACTTTTGTGAGTTGAAGGATCAGATACCGCATTTCCCGACAACGACCGTTCCTGGCAGAAAGCAAAAGT  
TCAAAATCACCCTGCTCCACCTACAACAAGCTCTCATCAACCGTGGCTCCCTCACTTTCTGGCTGGATGATGGGGCGA  
TTCAGGCTGGTATGAGTACGCAACACTTCTTACAGAGGCAGACCTCACTAGTTCCACTGAGCGTCAGACCCCGTAGAAA  
AGATCAAAGGATCTTCTTGAATCCTTTTTTCTGCGCGTAATCTGCTGCTTGAACAACAAAAAACCCGCTACCAGCGGT  
GGTTTGTGTTGCCGATCAAGAGCTACCAACTTTTTCCGAAGGTAACCTGGCTTCCAGCAGAGCGCAGATACCAATACTGTC  
CTTCTAGTGTAGCCGATTTAGGCCACCACTCAAGACTGTAGCACCGCTACATACCTCGCTCTGATACTGATACTGTTG  
CAGTGGCTGCTGCCAGTGGCGATAAGTCTGTCTTACCAGGGTTGAGCTCAAGACGATAGTTTACCAGGATAAGGCGCAGCGG  
TCGGGCTGAACGGGGGTTCTGTCACACAGCCAGCTTGGAGCGAACGACCTACCCGAACTGAGATACCTACAGCGTG

AGCATTGAGAAAGCGCCACGCTTCCCGAAGGGAGAAAGGCAGGACAGGTATCCGGTAAGCGGCAGGGTTCGGAACAGGAGA  
GCGCACGAGGGAGCTTCCAGGGGAAACGCCTGGTATCTTTATAGTCTGTCCGGTTTCGCCACCTCTGACTTGAGCGTC  
GATTTTTGTGATGCTCGTACGGGGGCGGAGCCTATGAAAAACGCCAAGCGGCCTTTTTACGGTCTCTGCGCTTTT  
GCTGGCCTTTTCTCATGTTCTTTCTTCCGCTTATCCCTGATTCTGTGGATAACCGTATTACCGCTTTGAGTGAGCTGA  
TACCGCTCGCCGAGCCGAACGACCGAGCGCAACGCGTGGCGCCGCGGTACCAGATCTTAAATCTAGATATCCATGGCT  
CTCACACCCCTCTTCCATTCTGGCACTCGATGCCATATATTTGCGATCTCGATCACAACGTGTCGAGACCATAACGCATATGG  
AGTTAGCCGCCGACTTTGAGTGATGTGTTGATCGTGGCCGCGGGCAGCGCCGGATCCGGTGTGGCCGAACGCCTTTCCG  
CGGACCCGAGCTGTCAGGTGACGGTGGTGGAGGCCGGCCCGCCCGTCCGGATCCGCGGGTGGCCGCGAGATCACC  
ACGGCGTGGCTACCCATCGGGCCGCGAGTTCGGTGGTGGCGCACTATGGGTCGACGTGACCGAGGATCCGCGCC  
GGCGACCGAGATCATCCGCGTTCGGTGGTGGCGGCTCCGGAGCGGTCAACGGTGGCTATTCTGTGCGCGCCTGCC  
CACCGACTTACCAGCGTGGCGGTTCCCGGATGGAGCTGGGACGATGTGCTGCCCATTTCCGTGCGATCGAGACCGAC  
CTCGACTTCCGACCCGCGTGCACGGCTCCGAAGTCCGATCAAGGTGCGCCGGTCCACGAATTCGACGGCTGCACCG  
CGGATTCGTGACGCGTATCCGCGCGGGGTATGGTGGATCGACGATCTCAACGGTCCGGATGCCGACGCGGGCT  
GCCACCCGCGTGGCGCGTGGCGCTGAACATCGACGGCGAACCCTCTCGGACCCGGAGGCGCCTACCTGCAGCC  
CGCACTCGACCGCCAACTGCATCTGCGCGCCGACACCCGGTCCGAGGGGATGTCGACGCGCTGCGCGGGCGGTG  
GGTGTGGAATGCGTGCAGCGGTGAGATCCTGTACGAGATCGAATCGTGTGTCGCGGGGCCATCGGCTCGGCACATCT  
GTTGCTGCTCTCAGGCATCGGGCCGGCGGGGACTTGGCGGCCACGGATCGCGGTGGCGGCGAACCTACCTGTGGG  
GACGGCGACAGTCCACCACCGAGTGGGTGCTGCCGGTGGCCTGGACCCCCACACATGACCTGCCGCGCTGGAAGC  
CGTGCTACCACGGCCGACGGCATCGATCCGGCCCTACACCGCGGGTTTCTCGGCGTGGTGCACGGGCCCCGAACAC  
GACCCGCGCACTCCACATCTCGGTGTCGCGCTCATGCTCCGATTACGGGGCAGGGTCCGCTCGCTCGCGCGCG  
ATCCCGCTGCCCCCGCAACCGTACATCGAACCCGTACGACACCGTCCGAGGGGATGTCGACGCGCTGCGCGGGCGCG  
AACTCGCCCGCAATTGTAAGTACGACGTAAGTGGGGGAGGCTCCTGGTGCAGTTCGACGACCTCGCGGGGAC  
CGCGCGCTGAGTCCGACGGCAAGCGTGTGGACCCGACGTGCCGGTACTCGGTGTCGAGCGGTTGTGGGTGGT  
CGACGGCTCGATGCCCCGCATCACCAGCCGCGGGCCGACGCGACGATCGCCATGATCGGCCACCGCGCCGCCGA  
GTTTATCGCGACCCACCACCACCACCACTAATAGTAAGCTTATCGATGTCGACGTAGTAACTAGCGTACGATCGACT  
GCCAGGCTCAAATAAAACGAAAGGCTCAGTGGAAAGACTGGCCCTTTCTGTTTATCTGTTGTTTCCGGCCATCGGC  
CGCGGTGATCAGCTGAACGACGAGGCGAAGCGGCAACCGCCGACGGCGAGGGTTCGACCGCTGCAACTC  
CCGGTGAACCTTGTCCCGTCTATTCTTCACTGCACCGCTCAAATCTGGTGTGAATGCCCTCGTCTGTTCCGCGCAG  
GCGGGGGGCTCTATTGTTGTCAGCATGAAAGTAGCCAGATCAGGGATGCGTTGCAACCGCGTATGCCAGGTCAGAA  
GAGTCCGACAAAGATTCAGACCCCTGAAAGAAAAATGGCCAGAGGGCGAAAAACACCTCTGACCAGCGGACCGGGCG  
ACGGAAATCGAACCCGCTAGCTAGTTTGAAGAATGGTGTCTGCCGACCATATATGGGCCGCTCAAGATAGGTTTTT  
ACCCCTCTCGGCTGCATCTAAGTGGAAAGAAATTCAGGTCGTAAGAAGCGCGTTGAAGCTGAGAGTTGCACAGGA  
GTTGCAACCCGGTAGCCTTGTTCAGACGAGAGGAGACCTAGTTGGCACGTGCGGGATGGGGATCGCTGAAGACTCAGC  
GCAGCGGGAGGATCAAAGCTCATACTCAACCCGACGAGCGGTGTGAGGTAACGCGCTGCAGACCTACGACAACAA  
GATGGACGCCGAAGCTGGCTCGCGGGCGAGAAGCGGCTCATCGAGATGGAGACCTGGACCCCTCCACAGGACCGGGC  
GAAGAAGGCAGCCGCCAGCGCCATCAGCTGGAGGAGTACACCCGAAAGTGGCTCGTGGAGCGCGACCTCGCAGACGG  
CACCAGGGATCTGACAGCGGGCAGCGGGAGCGCCGATCACCCTGCTAGGTGAAGTGGCGGTACAGAGATGACG  
CCAGTCTGGTGGCGTGGTGGCGGGATGGTAGGAAGCACCAGCTGCCGCGGGCATCCTACACCTGCTCCTCC  
GGCGGTGATGAACACAGCGGTGAGGACAAGCTGATCGCAGAGAACCCTGCGGATCGAGCAGAAGGCAGCCGATGA  
GCGCGACGTAGAGGCGTACGCCTGAGGAGCTGGACATCGTCCGCTGAGATCTTCGAGCACTACCGGATCGCGGCA  
TACATCTGGCGTGGACGAGCCTCCGGTTCGGAGAGCTGATCGAGCTTCGCCGCAAGGACATCGTGGACGACGGCATGA  
CGATGAAGCTCCGGGTGCGCGGTGGCGCTTCCCGCTGGGGAACAAGATCGTCTGTTGGCAACGCCAAGACCGTCCGGT  
GAAGCTCCTGTGACGGTCCGCTCACGTGCGGAGATGATCCGAGCGACATGAAGGACCGTACGAAGATGAACAAG  
GGCCCCGAGGCATTCTGTGACCACGACGACGGGCAACCGGCTGTCGAAGTCCGCGTTACCAAGTCCGCTGAAGCGTG  
GCTACGCCAAGATCGGTGCGCCGGAACCTCCGATCCACGACCTCCGCGCTGTCGGCGCTACGTTCCGCGCTCAGGCAGG  
TGCGACGACCAAGGAGCTGATGGCCCGTCTCGGTACACGACTCCTAGGATGGCGATGAAGTACCAGATGGCGTCTGAG  
GCCCGCGACGAGGCTATCGCTGAGGCGATGTCCAAGCTGGCCAAGACCTCCTGAAACGCAAAAAGCCCCCTCCAAGG  
ACACTGAGTCTAAAGAGGGGGTTTCTTGTAGTACGCGAAGAACCACGCTGGCCGCGAGCGCCAGCACCGCCGCTC  
TGTGCGGAGACCTGGGACACCGCCCGCCGCGCAGGAGCATTGCCGTTCCCGCCAGCTAGCAACAAAGCGACGTTG

>pPG36\_biocat

CCGACACCATCGAATGGTGCAAAACCTTTCCGCGTATGGCATGATAGCGCCCGAAGAGAGTCAATTCAGGGTGGTGAAT  
GTGAAACAGTAACGTTATACGATGTCGAGAGTATGCCGGTGTCTTATCAGACCGTTTCCCGCGTGGTGAACCAGGCC  
AGCCACGTTTCTGCGAAAACCGGGAAAAAGTGAAGCGGCGATGGCGGAGCTGAATTACATTCACAAACCGCGTGGCACA  
ACAATGGCGGGCAACAGTCTGTTGCTGATTGGCGTGGCCACCTCCAGTCTGGCCCTGCACGCGCCGTCGCAAAATTGTCG  
CGGCGATTAATCTCGCGCCGATCAACTGGGTGCCAGCGTGGTGGTGTGATGGTAGAACGAAGCGGGCGTCAAGCCGT  
TAAAGCGCGGTGCACAATCTTCTCGCGCAACGCGCTCAGTGGGTGATCATTAACTATCCGCTGGATGACCAGGATGCCAT  
TGCTGTGAAGCTGCCTGCACTAATGTTCCGCGTATTCTTGTATGCTCTGACCAGACACCCATCAACAGTATTATTTCT  
CCCATGAAGACGGTACGCGACTGGGCGTGGAGCATCTGGTGCATTGGGTACCAGCAAAATCGCGCTGTTAGCGGGCCC  
ATTAAGTTCTGTCTCGGCGCTGCGTCTGGCTGGCTGGCATAAATATCTACTCGCAATCAAATTCAGCCGATAGCGGA  
ACGGGAAGGGCAGTGGAGTGCATGTCGGTTTTCAACAAACCATGCAAAATGCTGAATGAGGGCATCGTTCCCACTGCGA  
TGCTGGTTGCCAACGATCAGATGGCGCTGGGCGCAATGCGCGCCATTACCGAGTCCGGGCTGCGCGTGGTGGCGGAT  
CTCGGTAGTGGGATACGACGATAACGAAGACGCTCATGTATATCCCGCCGTTAACCAACCAACAGGATTTCCGCT  
GCTGGGCAACCGCTGGACCGCTTGTGCTGCACTCTCTAGGGCCAGGCGGTGAAGGGGCAATCAGCTGTTGCCCGTC  
TCACTGGTGAAGAAAAAACACCCTGGCGCCAATACGCAAAACCGCCTCTCCCGCGCGTGGCCGATTCAATTAATGCAG  
CTGGCACGACAGTTTCCGACTGAAAAGCGGGCAGTGAGCGCAACGCAATTAATGTAAGTTAGCTCACTCATTAGGCACA  
ATTCTCATGTTTGCAGCTTATCATCGACTGCACGGTGCACCAATGCTTCTGGCGTCAGGCAGCCATCGGAAGCTGTGGTA  
TGGCTGTGACGGTCTGAAATCACTGCATAATTCTGTGCTCGTCAAGGCGCACTCCCGTCTGGATAATGTTTTTGGCCGA  
CATCAACAGGTTTGGCAAAATTTGAAATGAGTGTGACAAATTAATCATCGGCTCGTATAAATGTTGGAATTGTGAGC  
GGATAACAATTTACACAGGAAACAGCCAGTCCGTTTGTAGTGTTCACAGGACCTTACCAACAAGGACCATGACATGTA  
AAATCGAAGAAGGTAACCTGGTAATCTGGATTAACGGCGATAAAGGCTATAACGGTCTCGCTGAAGTCCGTAAGAAATTCG

AGAAAGATACCGAATTAAGTCAACCGTTGAGCATCCGGATAAACTGGAAGAGAAATCCACAGGTTGCGGCAACTGGCG  
ATGGCCCTGACATTACTTCTGGGCACACGACCGCTTTGGTGGCTACGCTCAATCTGGCCTGTTGGCTGAAATCCACCCCGG  
ACAAAGCGTCCAGGACAAGCTATCCGTTACCTGGATGCGCTACGTTACAACGGCAAGCTGATTGCTTACCCGCTCG  
CTGTTGAAGCGTTATCGCTGATTTATAACAAAGATCTGCTGCCGAACCCGCCAAAAACCTGGGAAGAGATCCCGGCGCTGG  
ATAAAGAAGTAAAGCGAAAGGTAAGAGCGCGCTGATGTTCAACCTGCAAGAACCCTACTTCACCTGGCCGCTGATTGCTG  
CTGACGGGGGTTATGCGTTCAAGTATGAAAACGGCAAGTACGACATTAAGACGTTGGCGTGGATAACGCTGGCGCGAAA  
GCGGGTCTGACCTTCTGGTTGACCTGATTAAAAAACAACACATGAATGCAGACACCGATTACTCCATCGCAGAAGCTGCC  
TTTAATAAAGGCCAAACAGCGATGACCATCAACGGCCCGTGGGCATGGTCCAACATCGACACCAGCAAAGTGAATTAAGT  
GTAACGGTACTGCCGACCTTCAAGGGTCAACCATCCAACCGTTCTGGTGGCTGCTGAGCGCAGGTATTAACGCCCGCCAG  
TCCGAACAAAGAGCTGGCAAAAGAGTTCTCGAAAATCTGCTGACTGATGAAGGTCTGGAAGCGGTTAATAAAGACAA  
ACCGCTGGGTGCCGTAGCGCTGAAGTCTTACGAGGAAGAGTTGGTAAAAGATCCGCGGATTGCCGCCACTATGGAAAACG  
CCCAGAAAGGTGAAATCATGCCGAACATCCCGCAGATGTCCGTTTCTGGTATGCCGTGCGTACTGCGGTGATCAACGCC  
GCCAGCGGTGCTCAGACTGTGATGAAGCCCTGAAAAGACGCGCAGACTAATTGAGCTCGAACAAACAACAATAACAAT  
AACAAACAACCTCGGGATCGAGGGAAGGATTTAGAATTCTGTTGATTGTTGGTGGCGGACGCGCCGTTAGCGTGTGCG  
AGAAGCTGAGCGCCGAGCTGTACGTTGACCTGACCTGTTGAGTGGCGGACCCGCTGCGGACCCGAGTCCGCGCAGATATCTGCAG  
GCACAGATTACCGATGGCGTGCCTGCCGATTGGTGGCGCCAGTAGCGTGGTTCGTCATTATGCGCAGACCCTGACCGA  
AGATCCGCCGCTGCACCGAAATATTGCGGGTAGTGTGGTGGTGGCAGTGGTGCAGTTAATGGCGTTATTTTTGTGCG  
TGGTCTGCCGACCGATTTTACCGCCTGGGCAGTTCGGGGTGGAGCTGGGATGATGTTCTGCCGATTTTCTGTCGCAATTG  
AAACCGATCTGATTTTGCACCGCCCTGCATGGCAGCGAAGTCCGATTAAGGTTCTGCGCTGCATGAATTTGATGGT  
GTACCCGAGCATTGTTGATGCAGTTAGTCCCGCAGTTATGGCTGGATTGATGATCTGAATGGCAGTGCAGATGCAG  
CACTGCCCGCCGGCGTGGTGTCTGTTCTGATTAATTGATGGCGGACCCGCTGCGGACCCGAGTCCGCGCAGATATCTGCAG  
CCGGCACTGGATCGTCCGAATCTGCATCTGCGCGCAGATACCCGTTCTGTCGCGTTCGTTGGTGAACATGATGCAGCCGT  
TGGTGTGGAATGCGTGGATGGTGAATTTCTGATGCAGATCGTATTGTGCTGAGTGGCGGCGCAATTGGCAGCGCCATCT  
GCTGCTGCTGAGCGGCATTGGTCCGGCAGGTGACCTGGCCGCACATGGCATTGCCGTGGCAGCCAATCTGCCGTTGGC  
ACCGCCACCGTTGATCATCCGGAATGGGTTCTGCCGTTGGCATGGACCCCGACCCATGATCTGCCGCCGCTGGAAGCCG  
TTCTGACCACCGCCGATGGCATTGAAATTCGCTGATACCCGCGGTTTTAGCGCCCTGGCAGTGGTCCGGAACATGATC  
CGGCAGAACTGCCGCATCTGGGTGGCCCTGATGCGTCCGATAGTTCGCGGCGCCGTTCCGCTGGCAAGTGCAGATCC  
GGCAGTTCGCCGATTATTGAACATCGCTATGATACCGTTGCAGGCGATGTTGATGCCCTGCGTGGCGGTGCAGAACTGG  
CCCGTGAACCTGGTGAATCATGCAGTGAAGTGGGTGAAGCCAGCTGGAGCACCAGTCAAGCATCTGGCCGGTACCGCCCG  
GCTGAGTGCAGATGGCCAGGGTGTGCTGGATCCGACCTGCCGCGTTCTGGGTGTGGAACGTTCTGTGGGTTGTGGATGCG  
AGCATTATCCCGGCACTACCAAGCCGTTGGCCGCGCATGCAACCTGGAATGATTGGCCATGTCGCGCAGAGTTTATTGCC  
ACCTAAAAGCTTGGCACTGGCCGCTGTTTTACAACTGCTGACTGGGGAACCCCTGGCGTTACCAACTTAATCGCCCTTGC  
AGCACATCCCCCTTTCGCCAGCTGGCGTAATAGCGAAGAGGCCCGCACCCGATCGCCCTTCCCAACAGTTGCGCAGCCTGA  
ATGGCGAATGGCAGCTTGGCTGTTTTGGCGGATGAGATAAGATTTTACGCTGATACAGATTAATCAGAACCGCAGAAGCG  
GTCTGATAAAACAGAAATTTGCTGGCGGAGTAGCGCGGTGGTCCACCTGACCCCATGCCGAACCTCAGAAGTGAACCGC  
CGTAGCGCCGATGGTAGTGGGGTCTCCCATGCGAGAGTAGGGAACCTGCCAGGCATCAAATAAAACGAAAGGCTCAGT  
CGAAAGACTGGGCTTTCTGTTTATCTGTTGTTGTCGGTGAACGCTCTCTGATAGGACAAATCCGCGGGAGCGGATT  
TGAACGTTGCGAAGCAACCGCCGAGGGTGGCGGAGGACCCGCCATAAACTGCCAGGCATCAAATTAAGCAGAA  
GGCCATCTGACGGATGGCCTTTTTGCGTTTTCTACAACTCTTTTGTATTTTTCTAAATACATTCAAATATGTATCCGCTCA  
TGAGACAATAACCCTGATAAATGCTTCAATAATATTGAAAAGGAAGAGTATGAGTATTCAACATTTCCGTGTCGCCCTTATT  
CCCTTTTTGCGGCATTTTGCCTTCTGTTTTGCTCACCCAGAAACGCTGGTGAAGTAAAAGATGCTGAAGATCAGTTGG  
GTGCACGAGTGGGTTACATCGAACTGGATCTCAACAGCGGTAAAGATCCTTGAGAGTTTTGCCCCGAAGAACGTTTCCCAA  
TGATGAGCACTTTTAAAGTCTGCTATGTGGCGGGTATTATCCCGTGTGACGCCGGGCAAGAGCAACTCGGTGCGCCGCA  
TACACTATTCTCAGAATGACTTGGTTGAGTACTACCAGTCAAGAAAAGCATCTTACGGATGGCATGACAGTAAGAGAATT  
ATGCAGTGTGCCATAACCATGAGTGATAACACTGCGGCCAACTTACTTCTGACAACGATCGGAGGACCGAAGGAGCTAAC  
CGTTTTTTGCACAACATGGGGATCATGTAACCTGCCTTATCGTTGGGAACCGGAGCTGAATGAAGCCATACCAAACGA  
CGAGCGTGACACCAGGATGCCTGTAGCAATGGCAACAACGTTGCCGAAAATTAATGCGGAACCTACTTACTCTAGCTTC  
CCGGCAACAATAATAGACTGGATGGAGGCGGATAAAGTTGAGGACCACTTCTGCGCTCGGCCCTCCGGCTGGCTGGT  
TTATTGCTGATAAATCTGGAGCCGGTGGCGGTTGAGTACTCAGGCAACTTGGATGAACGAAATAGACAGATCGCTGAGATAGGTGCCTCA  
CGTATCGTAGTTATCTACACGACGGGAGTCAAGGCAACTTGGATGAACGAAATAGACAGATCGCTGAGATAGGTGCCTCA  
CTGATTAAGCATTGGTAACTGTCAGACCAAGTTTACTCATATATACTTTAGATTGATTTACCCCGGTTGATAATCAGAAAAGC  
CCCAAAAACAGGAAGATTGTATAAGCAAATATTTAAATGTAACGTTAATTTTTGTTAAAATTCGCGTTAAATTTTTGTTAAA  
TCAGCTCATTTTTTAACCAATAGGCCGAAATCGGCAAAATCCCTTATAAATCAAAGAATAGACCGAGATAGGGTTGAGTGT  
TGTTCCAGTTTGAACAAGAGTCCACTATTAAGAAGCTGGACTCCAACGTCAAAGGGCGAAAAACCGTCTATCAGGGCGCA  
TGGCCCACTACGTGAACCATACCCAAATCAAGTTTTTTGGGGTTCGAGGTGCCGTAAAGCACTAAATCGGAACCCATAAAGG  
GAGCCCCGATTTAGAGCTTGACGGGAAAAGCCGGCGAACGTTGGCGAGAAAGGAAGGGAAGAAAGCGAAAGGAGCGGG  
CGCTAGGGCGCTGGCAAGTGTAGCGGTACGCTGCGGTAACCACCACACCCGCCGCGCTTAATGCGCCGCTACAGGGC  
GCGTAAAAGGATCTAGGTGAAGATCCTTTTTGATAATCTCATGACCAAAATCCCTAACGTTAGTTTTGTTCCACTGAGCG  
TCAGACCCCGTAGAAAAGATCAAAGGATCTTCTGAGATCCTTTTTCTGCGCGTAATCTGCTGCTTGCAAAACAAAAAAC  
CACCCTACCAGCGGTGTTTTGTTGCCGATCAAGAGCTACCAACTCTTTTTCCGAAGGTAAGTGGCTTACGACAGCGCG  
AGATAACAAACTGCTTCTAGTACCGGTAGTTAGGCCACTCTCAAGAACCTCTGTAGACCCGCTACCACTACCTCGC  
TCTGTAATCCTGTTACCAGTGGCTGCTGCCAGTGGCGATAAGTCTGTCTTACCGGTTGGACTCAAGACGATAGTTACC  
GGATAAGGCGCAGCGGTGGGCTGAACGGGGGTTCTGTCACACAGCCAGCTTGGAGCGAACGACCTACACCGAACTG  
AGATACCTACAGCGTGAGCTATGAGAAAAGCGCCACGCTTCCGAAAGGGAGAAAGGCGGACAGGTATCCGGTAAGCGGCA  
GGGTCCGAACAGGAGAGCGCACGAGGGAGCTTCCAGGGGGAAACGCTGGTATCTTTATAGTCTGTCGGGTTTCGCCA  
CCTCTGACTTGGCGCTGATTTTTGTGATGCTCGTCAAGGGGGCGGAGCCCTATGGAAAAACCGCAACCGCGCCTTTT  
TACGGTTCTGGCCTTTGCTGGCCTTTGCTCACATGTTCTTTCTGCGTTTACCCCTGATTTGTTGATAACCGATTACC  
GCCTTTGAGTGAAGCTGATACCGCTCGCCGACCGAACGACCGAGCGCAGCGAGTCAAGTGAAGCGGAAAGAGC  
GCCTGATGCGGATTTTTCTCTTACGCATCTGTGCGGTTTTACACCGCATATATGGTGCATCTCAGTACAATCTGCTCT  
GATGCCGCATAGTTAAGCCAGTATACACTCCGCTATCGCTACGTGACTGGGTGATGGTGGCGCCCGACACCCGCCAACA  
CCCGCTGACGCGCCCTGACGGGCTTGTCTGCTCCCGCATCCGCTTACAGACAAGCTGTGACCGTCTCCGGGAGCTGCAT  
GTGTCAGAGTTTTACCCTCATCACCGAACGCGGAGGCAGCTGCGGTAAGCTCATCAGCGTGGTCTGCAGCGATT

CACAGATGTCTGCCTGTTTCATCCGCGTCCAGCTCGTTGAGTTTCTCCAGAAGCGTTAATGTCTGGCTTCTGATAAAGCGGG  
CCATGTTAAGGGCGGTTTTTTCCTGTTTGGTCACTGATGCCTCCGTGTAAGGGGGATTCTGTTTCATGGGGGTAATGATACC  
GATGAAACGAGAGAGGATGCTCACGATACGGGTTACTGATGATGAACATGCCCGGTTACTGGAACGTTGTGAGGGTAAACA  
ACTGGCGGTATGGATGCGGCGGGACCAGAGAAAAATCACTCAGGGTCAATGCCAGCGCTTCGTTAATACAGATGTAGGTG  
TTCCACAGGGTAGCCAGCAGCATCCTGCGATGCAGATCCGGAACATAATGGTGCAGGGCGCTGACTTCCGCGTTTCCAGA  
CTTTACGAAACACGGAAACCGAAGACCATTGTTGTTGCTCAGGTCGCAGACGTTTTGCAGCAGCAGTCGCTTACGTT  
CGCTCGCGTATCGGTGATTCTGCTAACCAGTAAGGCAACCCGCCAGCCTAGCCGGTCTCAACGACAGGAGCAC  
GATCATGCGCACCCGTGGCCAGGACCCAACGCTGCCCGAAATT
